# Supplementary material for: In situ formation of a near-infrared controlled dual-antibacterial platform
Source: Royal Society of Chemistry journal article supplement (doi:10.1039/d1nj05028a), 2021-12-10
Supplement: d1nj05028a1.pdf [file d1nj05028a1.pdf]

## Supporting information

### **In situ formation of near-infrared controlled dual-antibacterial platform**

Zhuoyao Ni,<sup>#a</sup> Jiajie Hu,<sup>#a</sup> Hui Zhu,<sup>b</sup> Yazhuo Shang,<sup>\*a</sup> Daijie Chen,<sup>b</sup> Yinghong Chen<sup>c</sup> and Honglai Liu<sup>a</sup>

<sup>a</sup>Key Laboratory for Advanced Materials, School of Chemistry & Molecular Engineering, East China University of Science and Technology, Shanghai 200237, China

<sup>b</sup>Shanghai Jiao Tong University, No. 800 Dongchuan Road, Minhang District, Shanghai 201100, China

<sup>c</sup>Shanghai 5+5 Biotech LTD., Shanghai 200081, China

**\*Corresponding author: Yazhuo Shang (Y. Z. Shang)**

**e-mail: shangyazhuo@ecust.edu.cn**

**TEL & FAX: 86 21 6425 2767**

#These authors contributed equally to this work

### **Contents**

|                                                                                                    |    |
|----------------------------------------------------------------------------------------------------|----|
| Photographs of the release of ICG from hydrogel at different time within a week.....               | S1 |
| In vitro cytotoxicity of VL/SA/CMCS hydrogel containing different concentrations of VL.....        | S2 |
| UV-Vis absorption spectra of vancomycin under different concentrations and its standard curve..... | S3 |
| UV-Vis absorption spectra of RhB under different concentrations and its standard curve.....        | S4 |
| UV-Vis-NIR absorption spectra of ICG under different concentrations and its standard curve.....    | S5 |

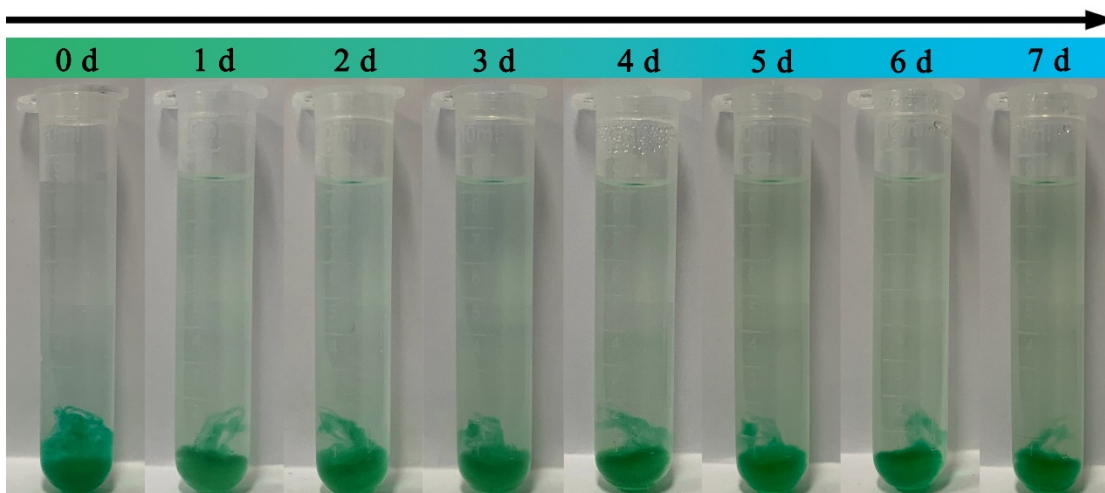

Fig. S1 Photographs of the release of ICG from hydrogel at different time within a week.

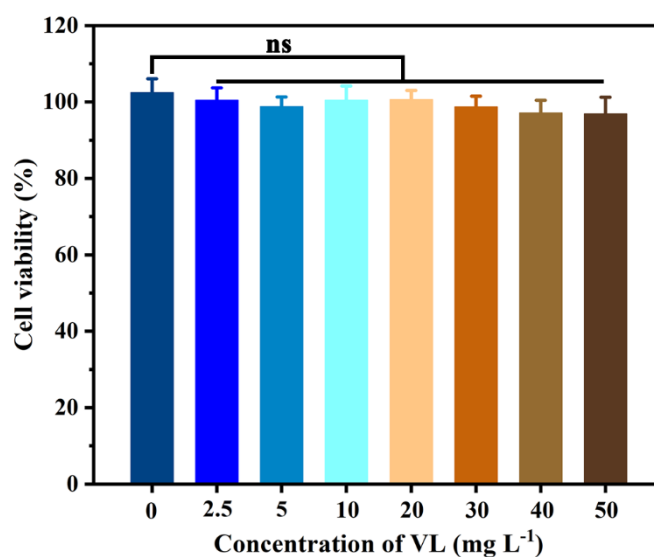

Fig. S2 In vitro cytotoxicity of VL/SA/CMCS hydrogel containing different concentrations of VL. Data are presented as the mean  $\pm$  standard deviation (n = 3).

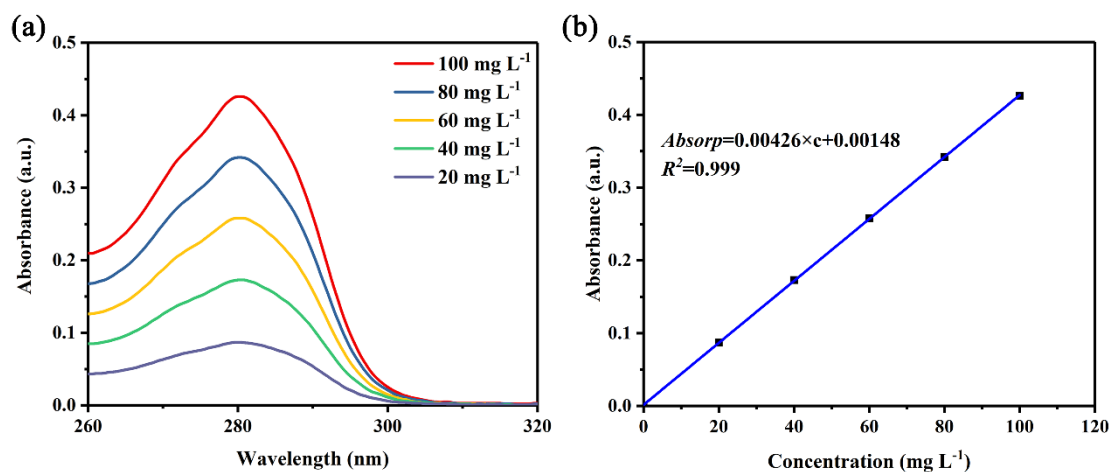

Fig. S3 (a) UV-Vis absorption spectra of vancomycin under different concentrations;

(b) The standard curve based on UV-Vis absorption of vancomycin at different concentrations.

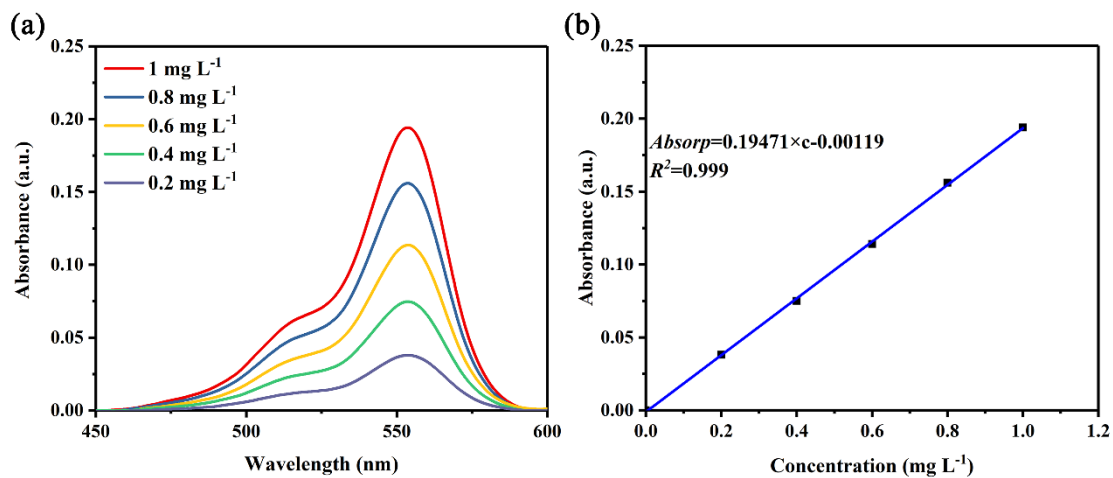

Fig. S4 (a) UV-Vis absorption spectra of RhB under different concentrations; (b) The standard curve based on UV-Vis absorption of RhB at different concentrations.

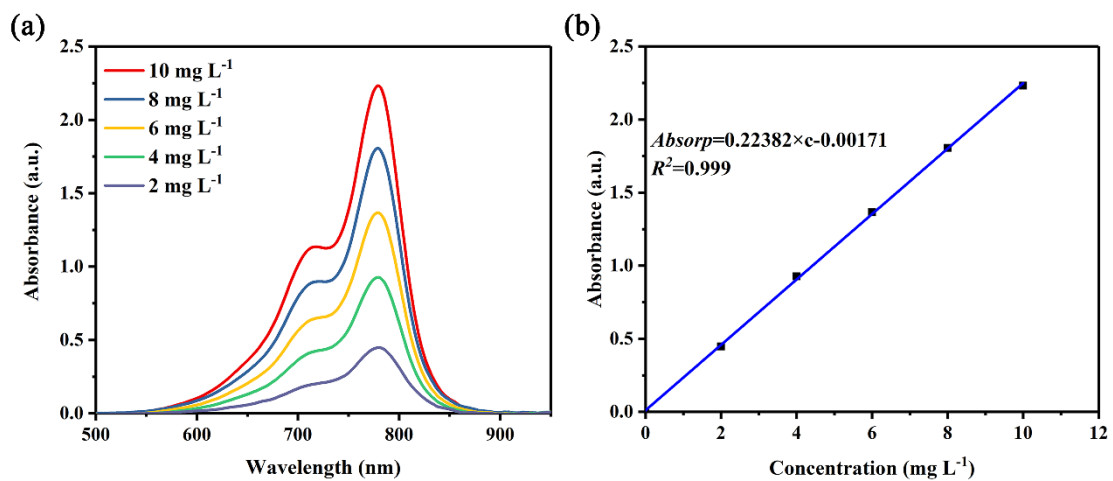

Fig. S5 (a) UV-Vis-NIR absorption spectra of ICG under different concentrations; (b) The standard curve based on UV-Vis-NIR absorption of ICG at different concentrations.
